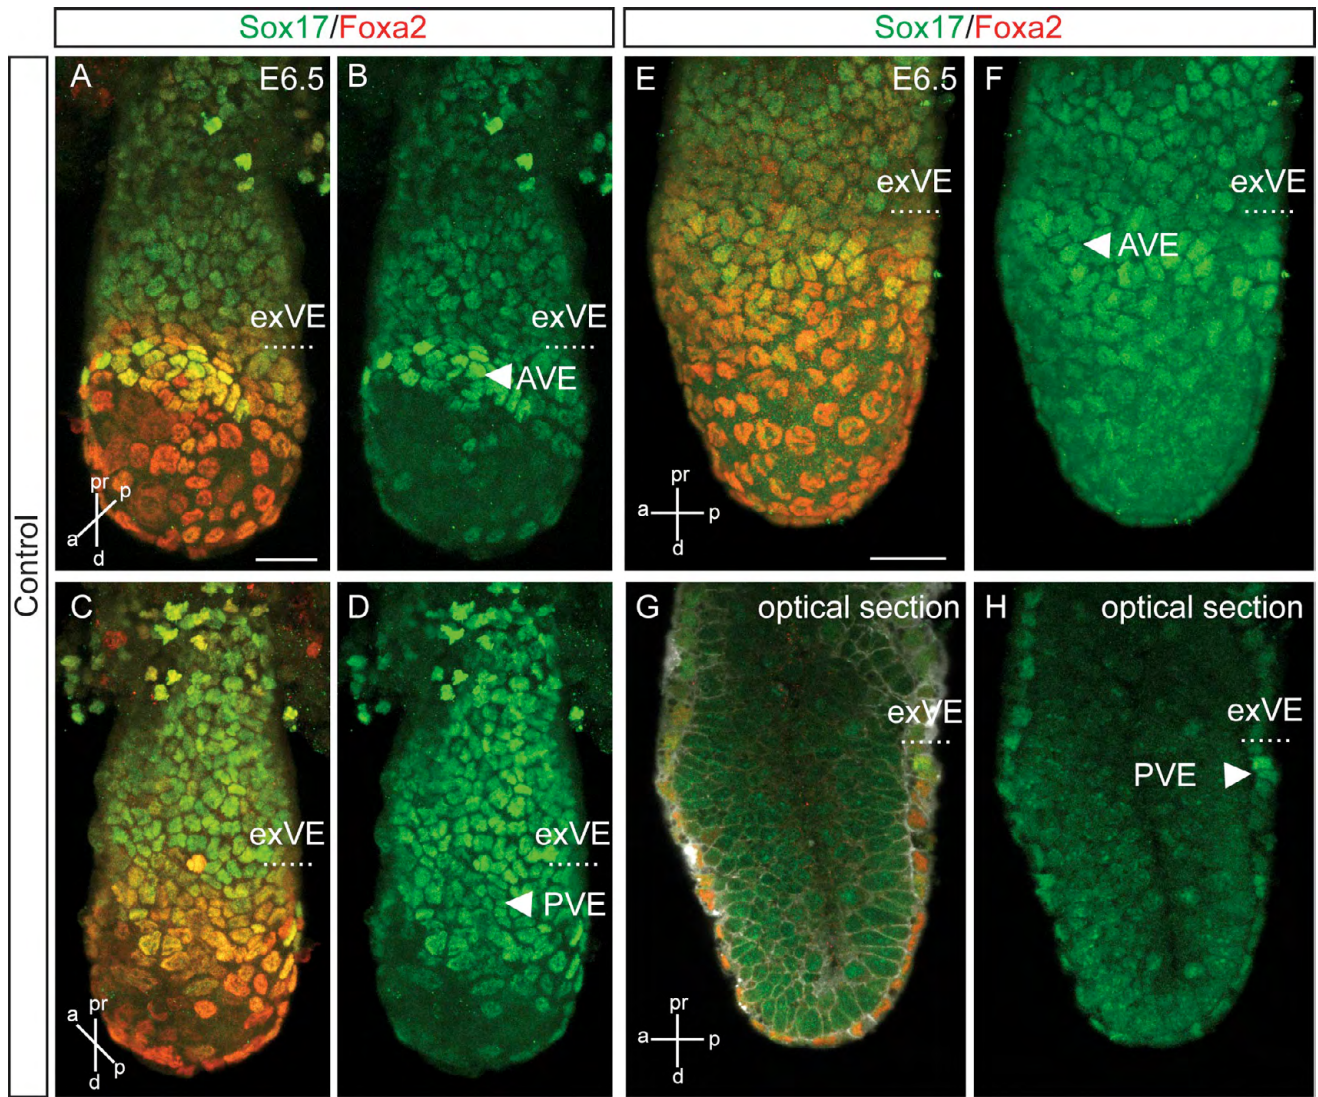

**Fig. S1. Sox17 is localised to the AVE and PVE at E6.5.** (A-H) Whole-mount antibody staining reveals that Sox17 is specifically localised to the extra-embryonic visceral endoderm (exVE), anterior visceral endoderm (AVE) (A,B,E,F) and posterior visceral endoderm (PVE) (C,D,G,H). Foxa2 shows a reciprocal proximal-distal localisation pattern in the embryonic visceral endoderm, AVE (A,E) and PVE (C,G). Scale bars: 25  $\mu$ m.

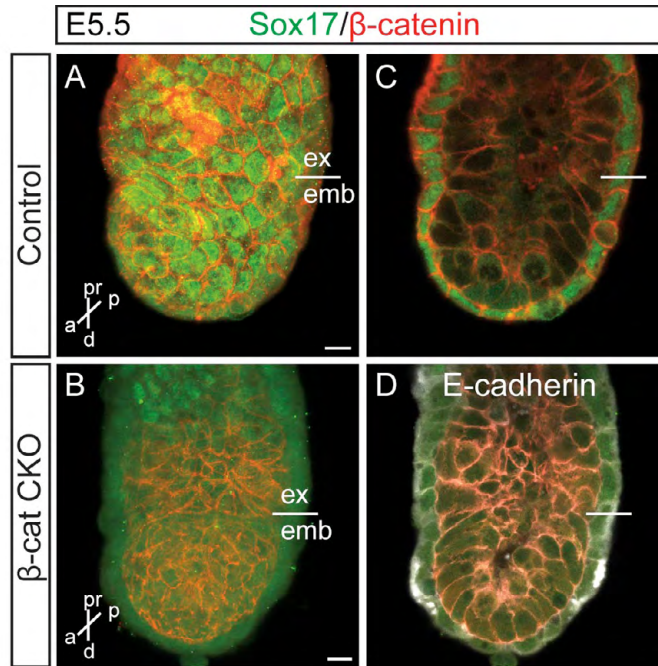

**Fig. S2. Complete deletion of  $\beta$ -catenin and loss of Sox17 expression in the VE at E5.5.** Sox17 and  $\beta$ -catenin antibody staining of control (A,C) and CKO (B,D) embryos confirms complete deletion of  $\beta$ -catenin in the VE at E5.5. E-cadherin staining is in white in D. The extra-embryonic (ex)-embryonic (emb) boundary is indicated. Scale bars: 10  $\mu$ m.

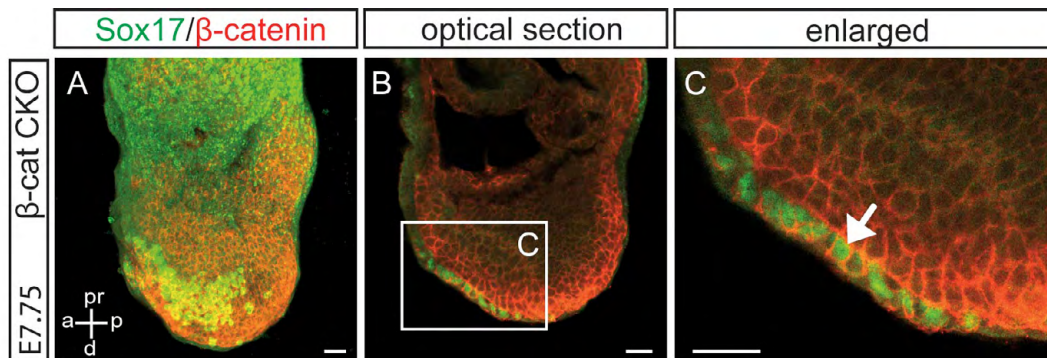

**Fig. S3. ADE cells are double positive for Sox17 and  $\beta$ -catenin.** IHC shows Sox17<sup>+</sup>  $\beta$ -catenin<sup>+</sup> cells (arrow) in the anterior endoderm of the mutant at E7.75 as z-projection (A), optical section (B) and higher magnification image (C). Scale bars: 25  $\mu$ m.

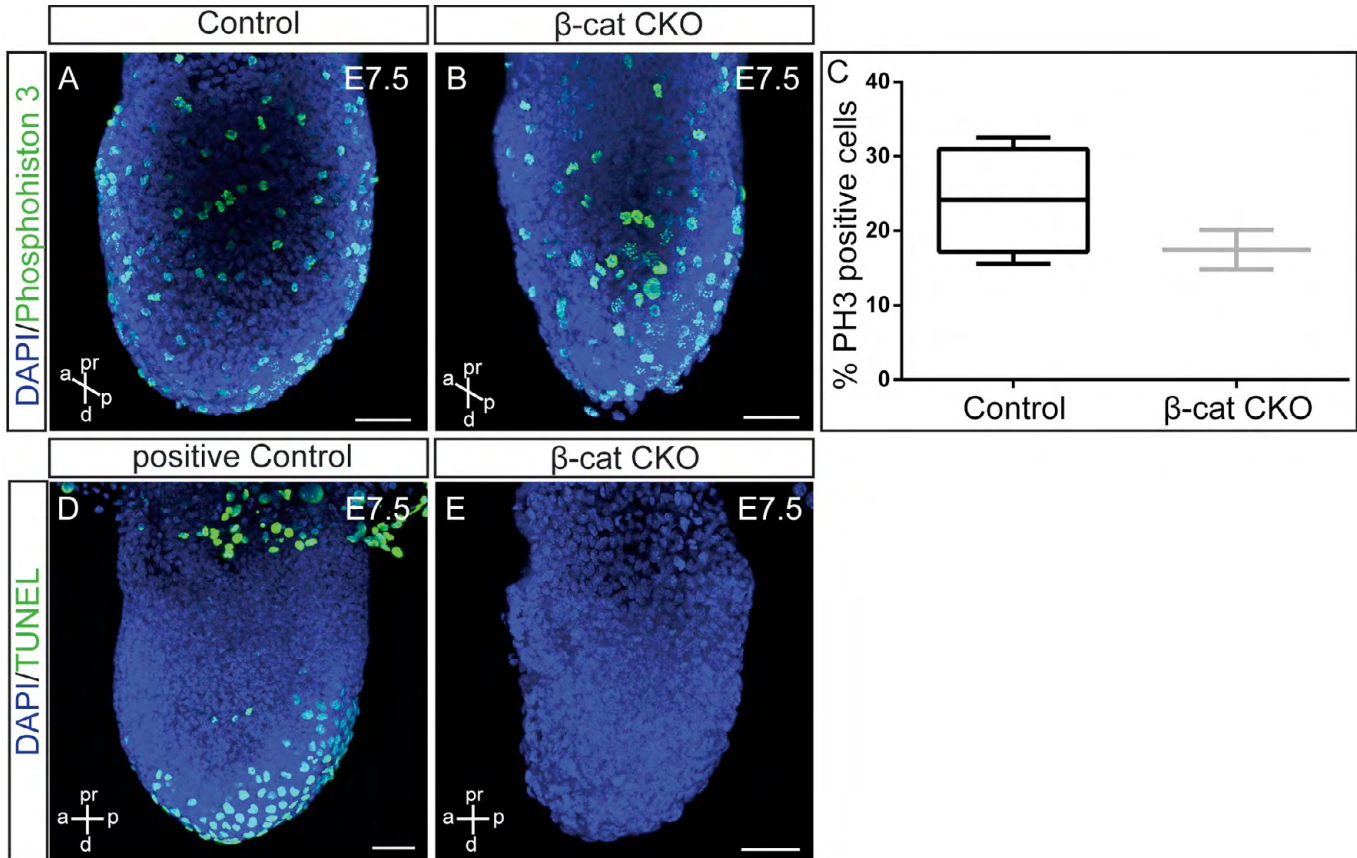

**Fig. S4. Proliferation and apoptosis rates are unchanged in CKO embryos.** (A,B) Cell proliferation indicated by phospho-histone H3 (PH3) antibody staining in control (A;  $n=4$ ) and CKO (B;  $n=2$ ) at E7.5. (C) PH3+ cells were quantified with IMARIS. Unpaired  $t$ -test revealed no significant change in proliferation. (D,E) No TUNEL-positive cells are detected in CKO (E;  $n=8$ ) at E7.5. A positive control embryo is shown in D. Scale bars: 50  $\mu$ m.

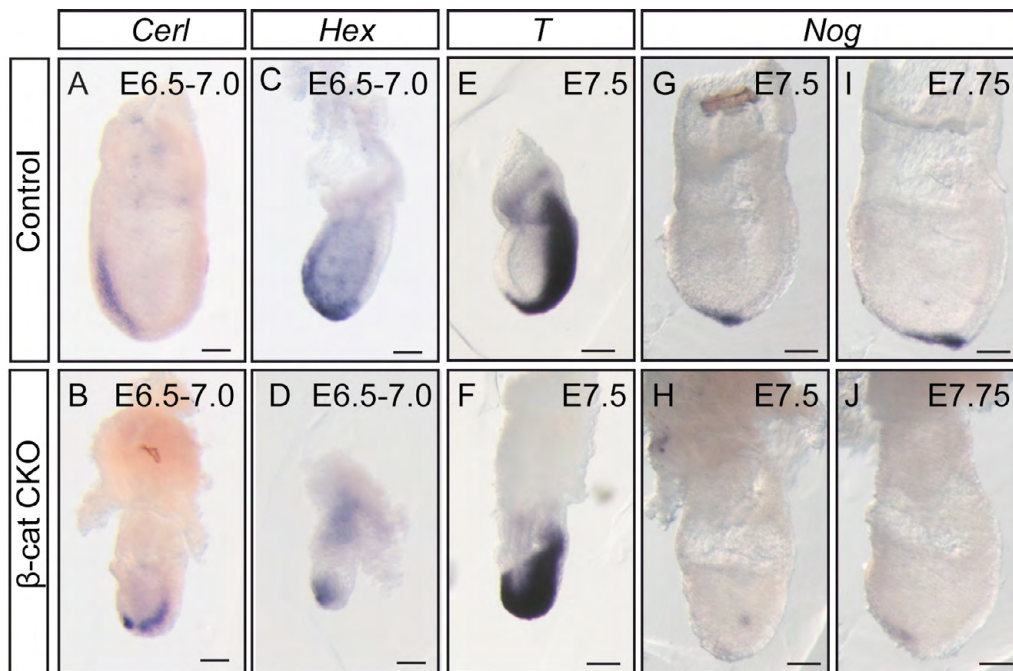

**Fig. S5. Defective AVE migration and failure of organizer gene induction in CKO embryos.** (A-J) WISH with the indicated antisense probes and at the indicated embryonic stages. In CKOs *Cer1* (B) and *Hex* (D) expression remain distally compared with control (A,C). *T* levels are comparable in CKO (F) and control (E) embryos at E7.5. Mutants show reduced expression of *Nog* in the node region (H,J) compared with controls (G,I) at E7.5. Anterior to the left. Scale bars: 100  $\mu$ m.

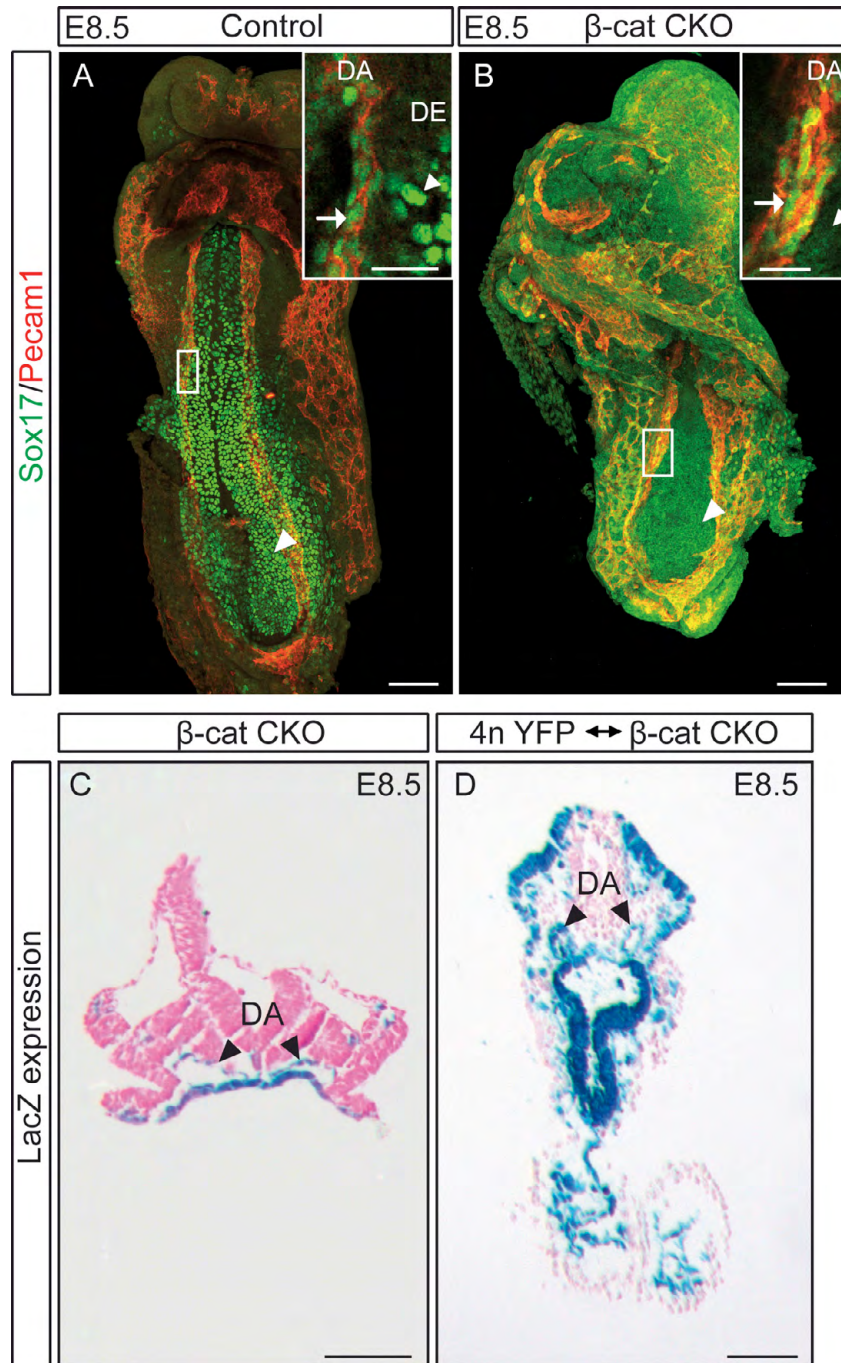

**Fig. S6. Sox17 is expressed in the dorsal aorta and vascular endothelial cells in  $\beta$ -catenin CKO embryos.** (A) Sox17 localisation to the gut endoderm (arrowhead) and colocalisation with Pecam1 in the dorsal aorta (DA, arrow) and blood vessels in control embryos as revealed by whole-mount antibody staining at E8.5 (inset). (B) Loss of Sox17 synthesis in the gut endoderm (arrowhead) but not in the endothelial cells of the DA (arrow) and blood vessels in  $\beta$ -catenin CKOs (inset). (C,D) Paraffin sections of  $\beta$ -catenin CKO embryos and aggregation chimeras at E8.5. Arrowheads point to the epithelial tube-like structure of the DA. Scale bars: 100  $\mu$ m, except 25  $\mu$ m in insets.

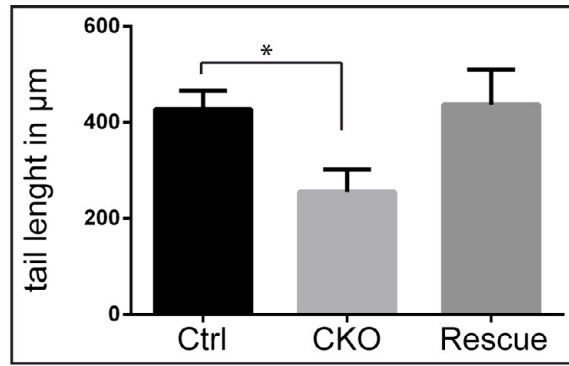

\*  $p = 0.002499$  (mann-whitney test)

**Fig. S7. Significantly reduced tail size in CKO embryos.** Quantification of posterior tail length by measuring the distance from the last somite to the end of the tail in control ( $n=6$ ), CKO ( $n=6$ ) and rescued CKO chimera ( $n=6$ ) at the 6- to 7-somite stage, with Leica and AxioVision. Tail length is significantly reduced in CKO embryos compared with control embryos and rescued chimera. Error bars indicate s.d.  $P$ -value was calculated using the wilcox.test function of the R statistics package.

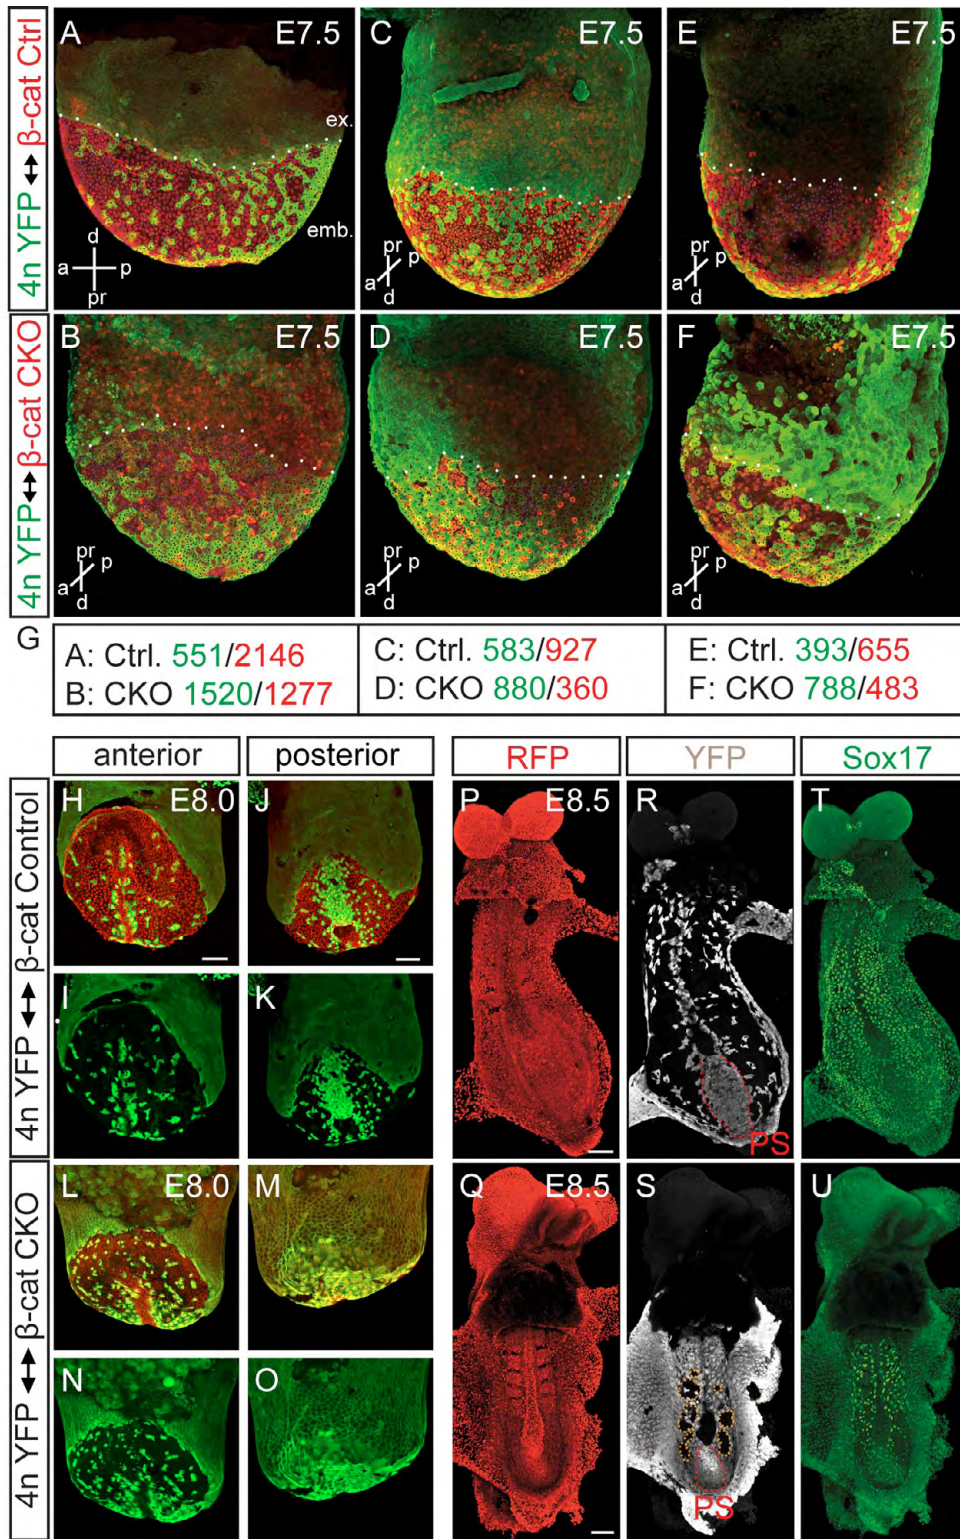

**Fig. S8. High contribution of YFP<sup>+</sup> VE cells to CKO aggregation chimera.** (A-F) Representative  $\beta$ -catenin CKO and control aggregation chimeras at comparable stages stained with antibodies to GFP (YFP<sup>+</sup> VE cells) and RFP ( $\beta$ -catenin control or CKO ESCs). White dotted line indicates ex/emb boundary. (G) Higher contribution of 4n YFP<sup>+</sup> VE cells (green) to aggregation chimera ( $n=3$ ) compared with control ( $n=3$ ) at E7.5. (H-O) Comparable numbers of CKO or control ESCs in the anterior (H,I,L,N) but not in the posterior region (J,K,M,O) of chimeric embryos at E8.0. (P-S) Contribution of CKO or control ESCs (P,Q) and YFP<sup>+</sup> VE cells (R,S) to aggregation chimera at E8.5. (T,U) Sox17 expression in the endoderm. Scale bars: 100  $\mu$ m.

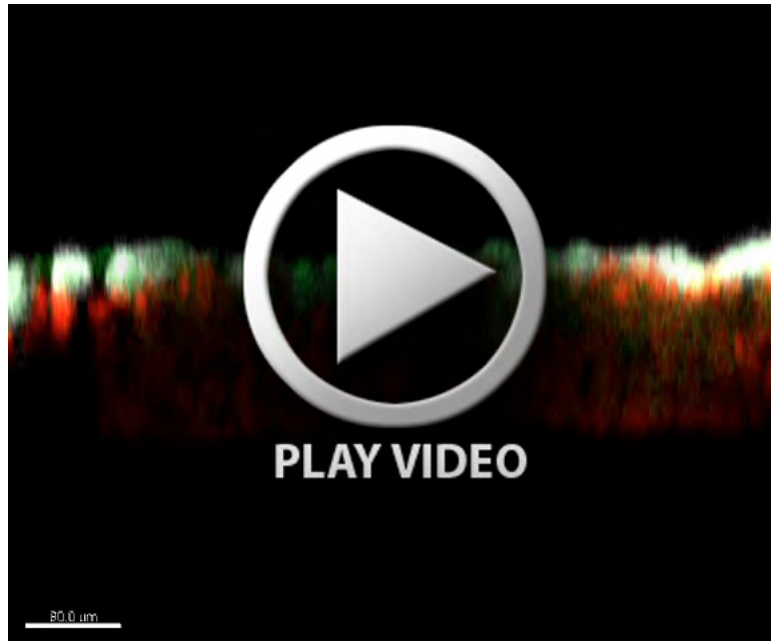

**Movie 1. 4n YFP<sup>+</sup> ↔ 2n β-catenin CKO at E8.5.** Transverse sections of the 4n YFP<sup>+</sup> ↔ 2n β-catenin CKO embryo in Fig. 5M, from caudal to rostral. β-catenin CKO ESCs are shown in red, VE cells in white and Sox17-expressing cells in green.

Table S1. Oligonucleotides for ChIP analysis

| <b>Name</b>      | <b>Forward primer</b>  | <b>Reverse primer</b>   | <b>Genomic position<br/>mm9</b> |
|------------------|------------------------|-------------------------|---------------------------------|
| <b>TBE 1</b>     | CCCCACATCTCAAGTGCTG    | TGGTGATCGAGCTCAGTTTG    | chr1:4484862-4484967            |
| <b>TBE 2</b>     | CCGCTACTGTTTTCAATCGTC  | CCCTCACCTCCACAGTGAC     | chr1:4485823-4485971            |
| <b>TBE 3</b>     | GGCTTTGATAACGTCGTGAG   | GTGAGTGGGCCATATTTTCAG   | chr1:4486458-4486528            |
| <b>Negative</b>  | GGATGGAAAGGCACCTATTG   | ACAGTGGGTCAAGCACATTG    | chr1:4488145-4488223            |
| <b>TBE 4-7</b>   | TAACTTCCAGGGCAGTTGTG   | GTCTGTCTTTAGGGCATTGG    | chr1:4488882-4488998            |
| <b>TBE 4-7</b>   | TGTGGCGTTAAGTCACTGAGTC | ACTGCCCTGGAAGTTACTGAAG  | chr1:4488983-4489067            |
| <b>TBE 8-10</b>  | AGTCTGAGAGAACATGGCACAC | GGCAAATTCTAATTCATCTGAGC | chr1:4489550-4489658            |
| <b>TBE 11</b>    | GTAGTGCACACCTTCAAAGAGG | AATGGCAGCTCACAATCATC    | chr1:4490552-4490631            |
| <b>TBE 12-13</b> | CTTCAGCAAAGGACTGTGAGTG | GTGTGTGGCCATGTAACCAG    | chr1:4492173+4492320            |



Table S2. Tcf/Lef binding elements (TBEs) in the *Sox17* upstream and downstream regulatory regions

| <b>TBE</b> | <b>Target sequence (5'-3')</b> | <b>Genomic position mm9</b> |
|------------|--------------------------------|-----------------------------|
| TBE 1      | CATTCCTTTGAGTTTTTC             | chr1:4484854                |
| TBE 2      | GAGATCTTTGAAAAGAT              | chr1:4485876                |
| TBE 3      | GCTGGCTTTGATAACGT              | chr1:4486521                |
| TBE 4      | TGAATTATTGAAGGAGA              | chr1:4488741                |
| TBE 5      | CTTCGATAAAAGCATTAA             | chr1:4488812                |
| TBE 6      | TTAATTTCAAAGATAAC              | chr1:4488911                |
| TBE 7      | AGAACCTTTGTTATGTG              | chr1:4489071                |
| TBE 8      | CAGATATCAAAATAAAT              | chr1:4489533                |
| TBE 9      | TCCATCTTTGAACTCTT              | chr1:4489588                |
| TBE 10     | AGTTCATCAAAGCTAAC              | chr1:4489676                |
| TBE 11     | ACACCTTCAAAGAGGTG              | chr1:4490617                |
| TBE 12     | TAGAAAACAAAGAAACA              | chr1:4492229                |
| TBE 13     | CCTTCAGCAAAGGACTG              | chr1:4492314                |
